# Supplementary material for: Assessment of Anatomic Restoration of Distal Radius Fractures Among Older Adults: A Secondary Analysis of a Randomized Clinical Trial
Source: PubMed Central journal article supplement (PMC6991267; doi:10.1001/jamanetworkopen.2019.19433), 2020-01-17
Supplement: jamanetwopen-3-e1919433-s002.pdf [file jamanetwopen-3-e1919433-s002.pdf]

## Supplementary Online Content

Chung KC, Cho HE, Kim Y, Kim HM, Shauver MJ; WRIST Group. Assessment of anatomic restoration of distal radius fractures among older adults: a secondary analysis of a randomized clinical trial. *JAMA Netw Open*. 2020;3(1):e1919433. doi:10.1001/jamanetworkopen.2019.19433

**eFigure 1.** CONSORT Flow Diagram

**eFigure 2.** Pairwise Correlation Matrix for Radiographic Variables

**eTable 1.** Unadjusted Two-Phase Regression (Sensitivity Analysis) for Functional Outcomes at 12-Months Post-Treatment

**eTable 2.** Unadjusted Two-Phase Regression (Sensitivity Analysis) for Patient-Reported Outcomes 12-Months Post-Treatment

This supplementary material has been provided by the authors to give readers additional information about their work.

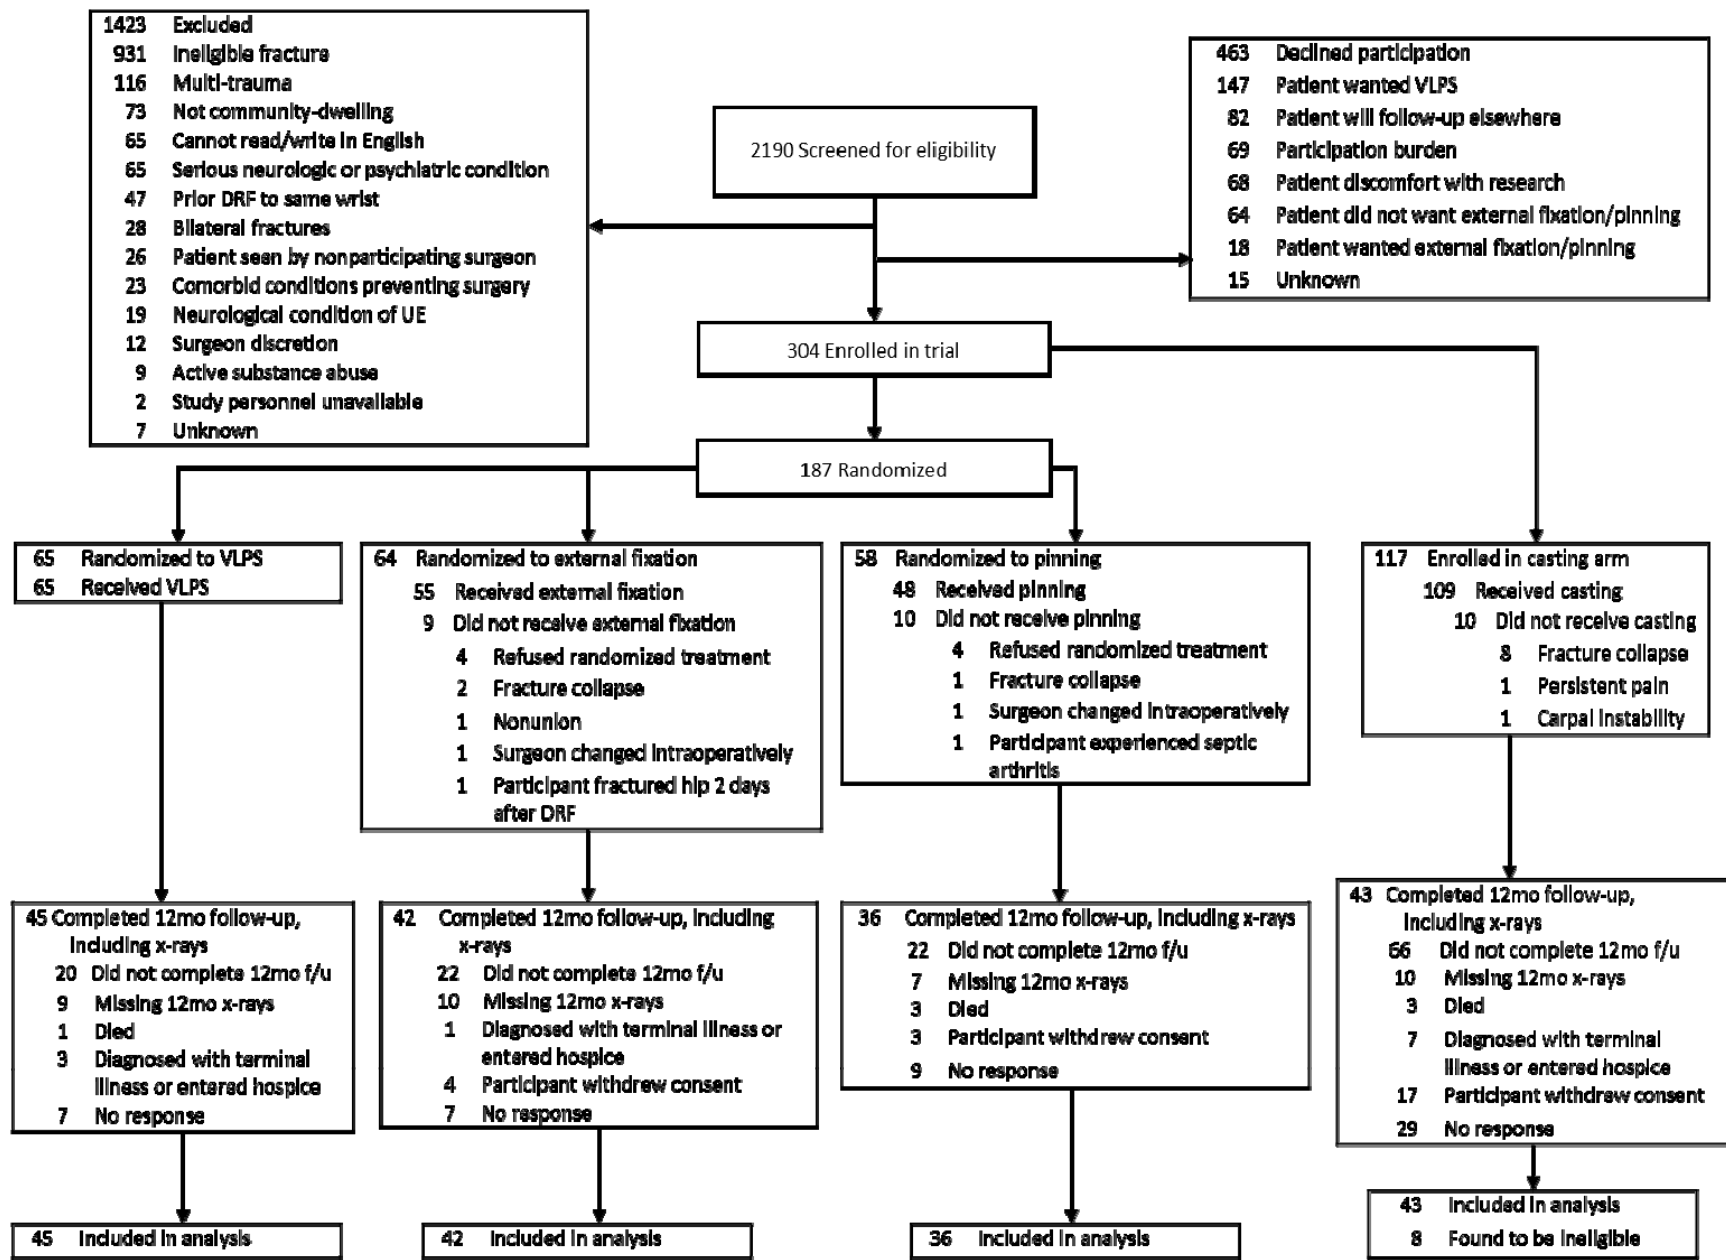

eFigure 1 CONSORT Flow Diagram

eFigure 2. Pairwise Correlation Matrix for Radiographic Variables

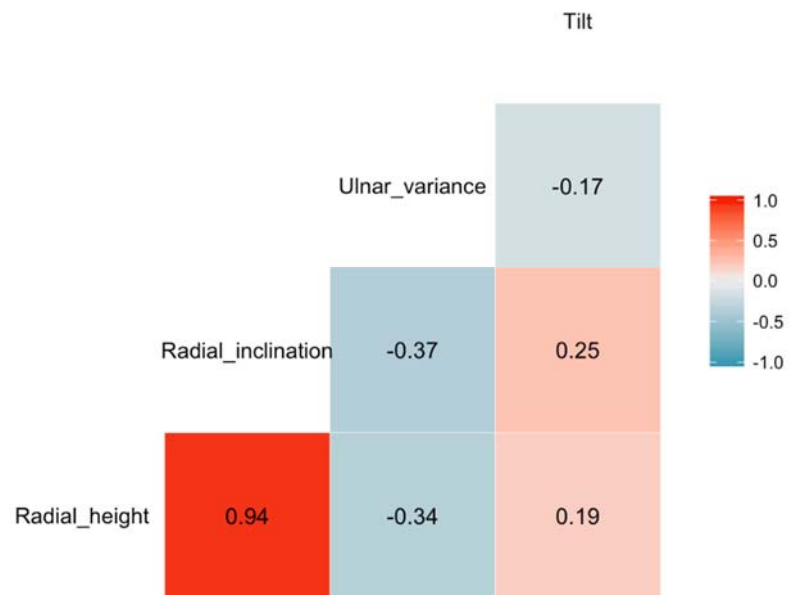

eTable 1. Unadjusted Two-phase Regression (Sensitivity Analysis) for Functional Outcomes at 12-months post-treatment<sup>a</sup>

| Outcome Variable            | Radiographic Variable | Age Group | Slope 1 | 95% CL       | P-value | Slope 2 | 95% CL      | P-value |
|-----------------------------|-----------------------|-----------|---------|--------------|---------|---------|-------------|---------|
| Grip Strength Difference    | Radial Inclination    | Younger   | -0.14   | -0.44, 0.17  | 0.39    | -0.11   | -0.59, 0.36 | 0.65    |
|                             |                       | Older     | -0.02   | -0.27, 0.23  | 0.88    | 1.09    | 0.47, 1.71  | 0.001   |
|                             | Ulnar Variance        | Younger   | -1.45   | -4.57, 1.67  | 0.37    | 0.26    | -0.41, 0.92 | 0.46    |
|                             |                       | Older     | -2.56   | -5.32, 0.22  | 0.08    | 0.10    | -0.41, 0.60 | 0.71    |
|                             | Tilt                  | Younger   | -0.009  | -0.12, 0.10  | 0.87    | -0.25   | -1.21, 0.72 | 0.62    |
|                             |                       | Older     | -0.05   | -0.15, 0.04  | 0.29    | 0.24    | -0.75, 1.23 | 0.63    |
| Arc of Motion Difference    | Radial Inclination    | Younger   | 0.37    | -0.73, 1.47  | 0.51    | 0.63    | -0.96, 2.21 | 0.44    |
|                             |                       | Older     | -0.78   | -1.83, 0.28  | 0.16    | 1.00    | -1.62, 3.62 | 0.46    |
|                             | Ulnar Variance        | Younger   | -6.83   | -18.97, 5.31 | 0.27    | 0.17    | -2.40, 2.74 | 0.90    |
|                             |                       | Older     | 9.00    | -3.38, 21.37 | 0.16    | 1.43    | -0.66, 3.52 | 0.18    |
|                             | Tilt                  | Younger   | -0.13   | -0.53, 0.26  | 0.51    | 1.91    | -1.28, 5.09 | 0.24    |
|                             |                       | Older     | -0.08   | -0.46, 0.31  | 0.69    | 0.92    | -2.97, 4.81 | 0.65    |
| Radial Deviation Difference | Radial Inclination    | Younger   | 0.32    | -0.16, 0.79  | 0.19    | 0.48    | -0.20, 1.17 | 0.17    |
|                             |                       | Older     | 0.52    | -0.07, 1.11  | 0.09    | 0.36    | -1.11, 1.83 | 0.63    |
|                             | Ulnar Variance        | Younger   | -1.73   | -6.61, 3.15  | 0.49    | -0.07   | -1.10, 0.96 | 0.90    |
|                             |                       | Older     | -0.53   | -7.00, 5.94  | 0.87    | -0.83   | -2.02, 0.36 | 0.18    |
|                             | Tilt                  | Younger   | 0.09    | -0.08, 0.25  | 0.31    | -0.75   | -2.06, 0.56 | 0.27    |
|                             |                       | Older     | -0.03   | -0.25, 0.19  | 0.81    | 0.38    | -1.86, 2.62 | 0.74    |
| Ulnar Deviation Difference  | Radial Inclination    | Younger   | 0.11    | -0.35, 0.58  | 0.64    | 0.001   | -0.68, 0.68 | 1.00    |
|                             |                       | Older     | -0.52   | -1.11, 0.08  | 0.09    | 0.13    | -1.35, 1.61 | 0.86    |
|                             | Ulnar Variance        | Younger   | -1.39   | -6.25, 3.47  | 0.58    | 0.38    | -0.66, 1.42 | 0.48    |
|                             |                       | Older     | 3.58    | -2.90, 10.06 | 0.28    | 0.76    | -0.43, 1.95 | 0.22    |
|                             | Tilt                  | Younger   | -0.14   | -0.30, 0.02  | 0.08    | -0.28   | -1.55, 0.99 | 0.67    |
|                             |                       | Older     | -0.08   | -0.29, 0.14  | 0.48    | 0.54    | -1.65, 2.72 | 0.63    |

<sup>a</sup> A separate regression model was run for each radiographic variable at a time. Slope 1 was calculated from data points with radial inclination  $\leq 22^\circ$ , ulnar variance  $\leq 0$ mm, or tilt  $\leq 11^\circ$ ; and slope 2 from those with radial inclination  $> 22^\circ$ , ulnar variance  $> 0$ mm, or tilt  $> 11^\circ$ .

eTable 2. Unadjusted Two-phase Regression (Sensitivity Analysis) for Patient-Reported Outcomes at 12-months post-treatment<sup>a</sup>

| Outcome Variable              | Radiographic Variable | Age Group | Slope 1 | 95% CL        | P-value | Slope 2 | 95% CL       | P-value |
|-------------------------------|-----------------------|-----------|---------|---------------|---------|---------|--------------|---------|
| MHQ Total Score Difference    | Radial Inclination    | Younger   | 1.38    | 0.43, 2.33    | 0.006   | -0.49   | -1.87, 0.89  | 0.49    |
|                               |                       | Older     | 0.04    | -0.85, 0.94   | 0.92    | -2.3    | -4.52, -0.08 | 0.05    |
|                               | Ulnar Variance        | Younger   | -5.46   | -16.15, 5.22  | 0.32    | 0.33    | -1.93, 2.59  | 0.78    |
|                               |                       | Older     | 9.60    | 0.20, 19.00   | 0.05    | 1.26    | -0.44, 2.97  | 0.15    |
|                               | Tilt                  | Younger   | 0.02    | -0.33, 0.37   | 0.92    | 1.48    | 1.34, 4.29   | 0.31    |
|                               |                       | Older     | -0.13   | -0.45, 0.20   | 0.45    | -0.26   | -3.55, 3.03  | 0.88    |
| MHQ Function Score Difference | Radial Inclination    | Younger   | 0.48    | -0.66, 1.63   | 0.41    | 1.42    | -0.24, 3.08  | 0.10    |
|                               |                       | Older     | -0.15   | -1.42, 1.12   | 0.81    | 3.17    | 0.01, 6.33   | 0.05    |
|                               | Ulnar Variance        | Younger   | -11.35  | -23.37, 0.66  | 0.07    | -0.63   | -3.16, 1.91  | 0.63    |
|                               |                       | Older     | -13.51  | -27.33, 0.31  | 0.06    | 0.81    | -1.69, 3.32  | 0.53    |
|                               | Tilt                  | Younger   | 0.07    | -0.33, 0.48   | 0.72    | -1.64   | -4.90, 1.62  | 0.33    |
|                               |                       | Older     | -0.09   | -0.55, 0.38   | 0.71    | 0.45    | -4.29, 5.19  | 0.85    |
| MHQ ADL Score Difference      | Radial Inclination    | Younger   | 0.69    | -0.06, 1.44   | 0.08    | 0.54    | -0.55, 1.63  | 0.34    |
|                               |                       | Older     | 0.28    | -0.32, 0.88   | 0.36    | 1.43    | -0.07, 2.92  | 0.07    |
|                               | Ulnar Variance        | Younger   | -6.96   | -15.01, 1.08  | 0.09    | 0.72    | -0.98, 2.42  | 0.41    |
|                               |                       | Older     | -10.82  | -17.06, -4.57 | 0.001   | 0.32    | -0.81, 1.45  | 0.58    |
|                               | Tilt                  | Younger   | 0.09    | -0.18, 0.35   | 0.52    | -1.48   | -3.62, 0.67  | 0.18    |
|                               |                       | Older     | 0.005   | -0.21, 0.22   | 0.96    | 0.70    | -1.45, 2.85  | 0.53    |

<sup>a</sup> A separate regression model was run for each radiographic variable at a time. Slope 1 was calculated from data points with radial inclination  $\leq 22^\circ$ , ulnar variance  $\leq 0$ mm, or tilt  $\leq 11^\circ$ ; and slope 2 from those with radial inclination  $> 22^\circ$ , ulnar variance  $> 0$ mm, or tilt  $> 11^\circ$ .
