# Supplementary material for: Assessment of Anatomic Restoration of Distal Radius Fractures Among Older Adults: A Secondary Analysis of a Randomized Clinical Trial
Source: PubMed Central journal article supplement (PMC6991267; doi:10.1001/jamanetworkopen.2019.19433), 2020-01-17
Supplement: jamanetwopen-3-e1919433-s003.pdf [file jamanetwopen-3-e1919433-s003.pdf]

## Data Sharing Statement

Chung. Assessment of Anatomic Restoration of Distal Radius Fractures Among Older Adults. *JAMA Netw Open*. Published January 17, 2020. 10.1001/jamanetworkopen.2019.19433

### Data

**Data available:** No

### Additional Information

**Explanation for why data not available:** No data sharing planned at this time
